# Supplementary material
Source: PubMed Central journal article supplement (PMC6125183)
Supplement: NIHMS1500908-supplement-JNE_15_5_056010_suppdata_pdf.pdf [file NIHMS1500908-supplement-JNE_15_5_056010_suppdata_pdf.pdf]

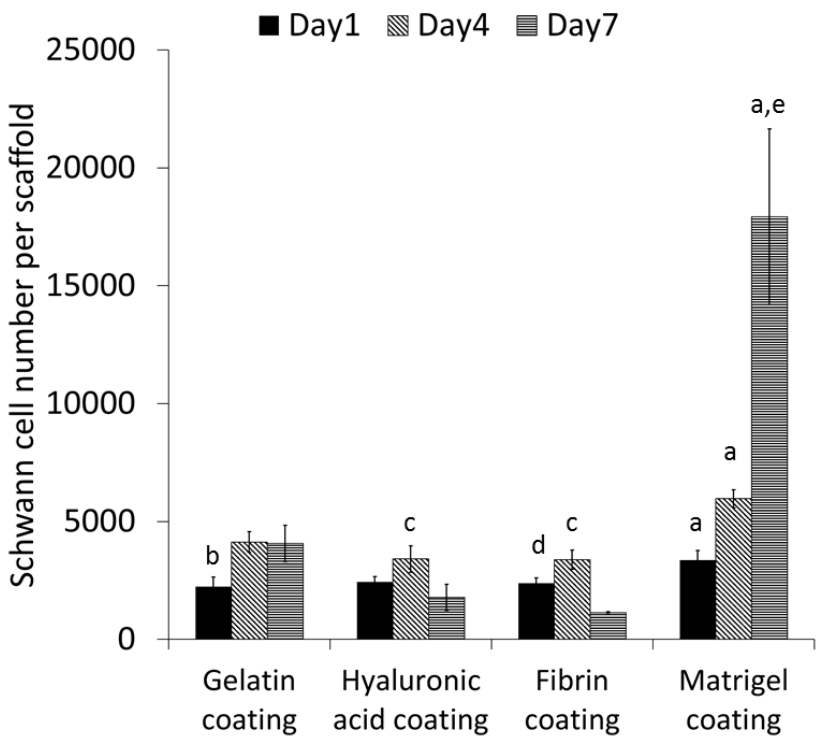

Supplemental Figure 1: SC numbers on PVDF-TrFE scaffolds using various coatings. <sup>a</sup> $p < 0.05$ , cell numbers on Matrigel-coated scaffolds are significantly higher than other coated groups at days 1, 4 and 7. <sup>b</sup> $p < 0.05$ , cell number at day 1 is significant lower than days 4 and 7 on gelatin-coated scaffolds. <sup>c</sup> $p < 0.05$ , cell numbers at day 4 are significantly higher than day 7 on hyaluronic acid-coated and fibrin-coated scaffolds. <sup>d</sup> $p < 0.05$ , cell number at day 1 is significantly higher than day 7 on fibrin-coated scaffolds. <sup>e</sup> $p < 0.05$ , cell number at day 7 is significantly higher than days 1 and 4 on Matrigel-coated scaffolds.
